# Supplementary material for: The cellular roles of Ccr4-NOT in model and pathogenic fungi—implications for fungal virulence
Source: Front Genet. 2013 Dec 20;4:302. doi: 10.3389/fgene.2013.00302 (PMC3868889; doi:10.3389/fgene.2013.00302)
Supplement: Supplemental Table 1 — Table accessions. Accession numbers and sequence data were retrieved from the yeast gene order browser (http://ygob.ucd.ie/) (Byrne and Wolfe, 2005), the Candida gene order browser (http://cgob.ucd.ie/) (Maguire et al., 2013) or the NCBI RefSeq database. [file DataSheet1.XLSX]

## Sheet: Sheet1
	CCR4 (1)	CCR4 (2)	CCR4 (3)	POP2/Caf1	Caf1 (2)	Not1(1)	Not1(2)	Not2	Not3	Not4	Caf40	yeast-specific:	Caf130	Not5
Saccharomyces cerevisiae	YAL021C			YNR052C		YCR093W		YDL165W	YIL038C	YER068W	YNL288W		YGR134W	YPR072W
Vanderwaltozyma polyspora	Kpol_1040.14			Kpol_1028.8		Kpol_1028.15	Kpol_458.1 WARNING: MISSING START	Kpol_530.34	Kpol_1070.25	Kpol_411.17	Kpol_1066.37		Kpol_480.12	Kpol_1006.7
Tatrapisispora phaffii	TPHA0H02680			TPHA0M02150		TPHA0M02090	TPHA0H02420	TPHA0F02940	TPHA0C01290	TPHA0K00870	TPHA0P01190		TPHA0A05680	TPHA0A03500
Tetrapisispora blattae	TBLA0A04660			TBLA0F00160		TBLA0F00220		TBLA0E00510	TBLA0D04270	TBLA0J01370	TBLA0A07900		TBLA0C04510	TBLA0H01490
Naumovozyma dairenensis	NDAI0H02520			NDAI0K02770		NDAI0I00270		NDAI0A01920	NDAI0A02690	NDAI0E04850	NDAI0A06040		NDAI0G00900	NDAI0A05080
Naumovozyma castellii	NCAS0F01640			NCAS0A05690		NCAS0D04690		NCAS0A14130	NCAS0A13350	NCAS0E03290	NCAS0A09850		NCAS0E00770	NCAS0A11210
Kazachstania naganishii	KNAG0D04840			KNAG0D00160		KNAG0I02650		KNAG0C03760	KNAG0D01800	KNAG0L01570	KNAG0K02290		KNAG0B00770	KNAG0A07290
Kazachstania africana	KAFR0K00670			KAFR0C04830		KAFR0J02600		KAFR0B00850	KAFR0C02470	KAFR0L00960	KAFR0A08270		KAFR0C02000	KAFR0H00860
Candida glabrata	CAGL0H06149g			CAGL0C03399g		CAGL0E00451g		CAGL0I03388g	CAGL0L01001g	CAGL0J03102g	CAGL0M03553g		CAGL0I10428g	CAGL0D01342g
Saccharomyces bayanus var. uvarum	Suva_1.45			Suva_14.407		Suva_3.131		Suva_4.81	Suva_9.162	Suva_5.180	Suva_14.51		Suva_7.422	Suva_16.401
Saccharomyces kudriavzevii	Skud_1.40			Skud_14.384		Skud_3.167		Skud_4.92	Skud_9.131	Skud_5.185	Skud_14.49		Skud_7.445	Skud_16.361
Saccharomyces mikatae	Smik_1.45			Smik_14.382		Smik_3.191		Smik_4.73	Smik_9.153	Smik_5.202	Smik_14.43		Smik_6.230	Smik_16.316
Zygosaccharomyces rouxii	ZYRO0D05302g			ZYRO0D17644g		ZYRO0D17512g		ZYRO0F11638g	ZYRO0D16302g	ZYRO0C08360g	ZYRO0B07062g		ZYRO0D09790g	ZYRO0C16588g
Torulaspora delbrueckii	TDEL0H03730			TDEL0A07940		TDEL0A07880		TDEL0C02010	TDEL0H02330	TDEL0H01950	TDEL0E00810		TDEL0D05650	TDEL0C05120
Kluyveromyces lactis	KLLA0F15884g			KLLA0C18821g		KLLA0C18612g		KLLA0D12408g	KLLA0E04335g	KLLA0C08041g	KLLA0E13267g		KLLA0E03961g	KLLA0B09196g
Eremothecium gossypii	ACR288W			ABR119C		ABR112C		ACL151C	ADL108C	ADL064W	AEL194W		AFR316W	ADL364C
Eremothecium cymbalariae	Ecym_7354			Ecym_7005		Ecym_6036		Ecym_4726		Ecym_4325	Ecym_3537		Ecym_1232	Ecym_3456
Lachancea kluyveri	SAKL0B10032g			SAKL0A00242g		SAKL0A00440g		SAKL0F11308g	SAKL0F07964g	SAKL0F08844g	SAKL0C12012g		SAKL0F02596g	SAKL0B08052g
Lachancea thermotolerans	KLTH0D02310g			KLTH0A07656g		KLTH0A07502g		KLTH0H01320g	KLTH0A03652g	KLTH0A04532g	KLTH0A01672g		KLTH0G02442g	KLTH0F11880g
Lachancea waltii	Kwal_26.7112			Kwal_23.6505		Kwal_23.6473		Kwal_56.24634	Kwal_47.18114	Kwal_23.5859	Kwal_23.5215		Kwal_47.18886	Kwal_23.3962
Candida albicans SC5314	orf19.5101			orf19.5734		orf19.1084		orf19.6075	orf19.2012	orf19.2379	orf19.7198		orf19.6220	orf19.5107
Candida albicans WO-1	CAWG_00601			CAWG_05005		CAWG_04952		CAWG_01339	CAWG_03888	CAWG_01677	CAWG_05714		CAWG_00724	CAWG_00595
Candida dubliniensis	CD36_07750			CD36_64190		CD36_64860		CD36_00270	CD36_16020	CD36_28580	CD36_73530		CD36_06460	CD36_07820
Candida tropicalis	CTRG_03152			CTRG_02728		CTRG_02760		CTRG_04300	CTRG_01298	CTRG_00758	CTRG_05180		CTRG_04197	CTRG_03174
Candida parapsilosis	CPAR2_804660			CPAR2_600050		CPAR2_600340		CPAR2_109710	CPAR2_213770	CPAR2_802040	CPAR2_805580		CPAR2_208950	CPAR2_804720
Candida orthopsilosis	CORT0A04670			CORT0H02750		CORT0H02450		CORT0B10800	CORT0A13180	CORT0A02090	CORT0H01920		CORT0A08220	CORT0A04730
Lodderomyces elongisporus	LELG_00382			LELG_04995		LELG_04966		LELG_01468	LELG_01163	LELG_00275	LELG_05006		LELG_00807	LELG_00376
Debaromyces hansenii	DEHA2F04136g			DEHA2E01496g		DEHA2E01573g		DEHA2G07282g	DEHA2A01342g	DEHA2F20328g	DEHA2A04576g		DEHA2D14454g	DEHA2F04004g
Scheffersomyces stipitis	PICST_55298			PICST_88664		PICST_65421		PICST_34119	PICST_41699	PICST_79785	PICST_30991		PICST_51842	PICST_75782
Candida tenuis	CANTEDRAFT_117384			CANTEDRAFT_112471		CANTEDRAFT_117969		CANTEDRAFT_115002	CANTEDRAFT_92168	CANTEDRAFT_99986	CANTEDRAFT_114078		cten_CGOB_00186	CANTEDRAFT_117398
Spatasphora passalidarum	SPAPADRAFT_68158			SPAPADRAFT_143129		SPAPADRAFT_143625		SPAPADRAFT_133106	SPAPADRAFT_151830	SPAPADRAFT_135323	SPAPADRAFT_63613		SPAPADRAFT_132123	SPAPADRAFT_72826
Meyerozyma guilliermondii	PGUG_01290			PGUG_04013		PGUG_04019		PGUG_02842	PGUG_04933	PGUG_00304	PGUG_00203		PGUG_00529	PGUG_01284
Candida lusitaniae	CLUG_01308			CLUG_01028		CLUG_05208		CLUG_04136	CLUG_05852	CLUG_03959	CLUG_03266		CLUG_01432	CLUG_00168
Yarrowia lipolytica	XP_500917.1			XP_500803.1		XP_505772.1		XP_501245.1	XP_503626.1	XP_504890.1	XP_504943.1
Aspergillus fumigatus Af293	XP_751557.1			XP_753897.1		XP_754595.1		XP_755446.2	XP_749342.1	XP_750771.1	XP_751592.1
Neurospora crassa OR74A	Q9C2R2.2			XP_959029.1		XP_960299.1		XP_001728090.1	XP_955865.1	XP_957688.2	XP_960336.1
Schizosaccharomyces japonicus yFS275	XP_002173748.1			XP_002175516.1		XP_002174735.1		XP_002172320.1	XP_002175462.1	XP_002175010.1	XP_002171573.1
Schizosaccharomyces pombe 972h-	NP_587901.1			NP_588385.2		NP_593323.1		NP_587823.2	NP_594789.2	NP_593078.1	NP_594984.1
Cryptococcus neoformans var. grubii H99	AFR96417.1			AFR94436.1		AFR93756.1		AFR98047.1	AFR95920.1	AFR93340.1	AFR97920.1
Cryptococcus neoformans var. neoformans JEC21	XP_572083.1			XP_568004.1		XP_569749.1		XP_569664.1	XP_571340.1	XP_568905.1	XP_569497.1
Cryptococcus gattii WM276	XP_003195102.1			XP_003193445.1		XP_003193135.1		XP_003192903.1	XP_003194625.1	XP_003191318.1	XP_003192764.1
	cnot6	cnot6l		cnot7	cnot8	cnot1		cnot2	cnot3	cnot4	Cnot9				lost in fungi:	Cnot10	Cnot11
Homo sapiens	NP_056270.2	NP_653172.2		NP_037486.2	NP_004770.4	NP_057368.3		NP_055330.1	NP_055331.1	NP_001008226.1	NP_005435.1					NP_056257.1	NP_060016.3
Drosophila melanogaster	NP_732964.1			NP_648538.1		NP_001097244.1		NP_730966.1	NP_610176.1	NP_723578.1	NP_728284.1					NP_650215.1	NP_726406.1
Danio rerio	NP_997825.1	NP_001018474.1	NP_001103498.1	NP_001070723.1	NP_998644.1	NP_001073420.1		NP_001082993.1	NP_956134.1	NP_957463.1	NP_999925.1					NP_001071000.1	NP_001082810.1
Xenopus tropicalis		NP_001120421.1		NP_001096375.1	NP_001016578.1	NP_001090658.1		NP_001106600.1	NP_001121452.1	NP_001025571.1	NP_989024.1					NP_001016273.1	XP_002934570.1
Trichoplax adhaerens	XP_002115700.1			XP_002113052.1		XP_002111977.1		XP_002117797.1	XP_002110147.1	XP_002107888.1	XP_002111160.1					XP_002109023.1	XP_002115481.1
Mus musculus	NP_997649.1	NP_659159.1		NP_035265.1	NP_081225.1	Q6ZQ08.2		NP_001032935.2	NP_666288.1	NP_058573.3	NP_067358.1					NP_705813.2	NP_082319.1
Acanthamoeba castellanii str. Neff	XP_004335138.1			XP_004337732.1		XP_004333306.1		XP_645358.1	XP_004342255.1	XP_004345871.1						XP_004352948.1
Dictyostelium purpureum	XP_003292522.1			XP_003283707.1, XP_003295228.1		XP_003288989.1		XP_003289905.1	XP_003287477.1	XP_003290681.1	XP_003292070.1, XP_003287384.1					XP_003290913.1	XP_003290663.1
Dictyostelium discoideum AX4				XP_638651.1, XP_638302.1		XP_643319.1		XP_638512.1	XP_645358.1	XP_644313.1	XP_646272.1, XP_643823.1					XP_640748.1	XP_001134571.1
